**Pulsed jet dynamics of squid hatchlings at intermediate Reynolds numbers**

Ian K. Bartol, Paul S. Krueger, William J. Stewart and Joseph T. Thompson

10.1242/jeb.033241

There were several errors published in *J. Exp. Biol.* **212**, 1506-1518.

On p. 1507, in paragraph 4 of the Introduction, the fourth and fifth sentences read:

Moreover, for a fixed  $\dot{U}$ ,  $Re \propto L_b$ . Thus, weight-specific drag is proportional to  $Re^{-1/2}$  at high  $Re$  and  $1/Re^{-1/2}$  at low  $Re$  for swimming at a fixed speed in body lengths  $s^{-1}$ .

The text should have read:

Moreover, for a fixed  $\dot{U}$ ,  $Re \propto L_b^2$ . Thus, weight-specific drag is proportional to  $Re^{1/2}$  at high  $Re$  and  $Re^{-1/2}$  at low  $Re$  for swimming at a fixed speed in body lengths  $s^{-1}$ .

We apologise to authors and readers for this error.
